1 Title: Emergence of a novel interaction between brown bear and cicada  
2 due to anthropogenic habitat modification

3 KANJI TOMITA<sup>1,3\*</sup> and TSUTOM HIURA<sup>2</sup>

4 <sup>1</sup>Graduate School of Environmental Science, Hokkaido University, N10 W5,  
5 Kita-ku, Sapporo, Hokkaido 060 0810, Japan

6 <sup>2</sup>Field Science Center for Northern Biosphere, Hokkaido University, N9 W9,  
7 Kita-ku, Sapporo, Hokkaido 060 0809, Japan

8 \*corresponding author

9 <sup>3</sup>E-mail: ktomita38@gmail.com

10 *Keywords: novel species interaction; Ursus arctos; Lyristes bihamatus;*  
11 *predator-prey interaction; plantation; cool-temperate forest; Shiretoko*  
12 *World Heritage*

## 13 **Abstract**

14           Novel species interactions have generally emerged in ecosystems that are highly  
15 modified by human activities. Anthropogenic habitat modification, such as  
16 afforestation, is one possible driver of novel species interactions; however, empirical  
17 evidence remains scarce. In this study, we show that a novel predator-prey interaction  
18 between the brown bear (*Ursus arctos*) and nymphs of a cicada species (*Lyristes*  
19 *bihamatus*) is generated by anthropogenic habitat modification. We evaluated the  
20 frequency of brown bear predation on cicada nymphs and the density of cicada  
21 nymphs between natural forests and plantations, which are a typical type of human-  
22 modified habitat. We found that brown bear predation on cicada nymphs occurred  
23 only in the plantations. The density of cicada nymphs in the plantations was  
24 significantly higher than in the natural forest. Our results indicate that the plantation  
25 leads to the emergence of the bear-cicada interaction due to increasing the density of  
26 cicada nymphs. The study draws attention to the overlooked effects of anthropogenic  
27 habitat modification on species interactions.

## 28 **Introduction**

29 Species interactions vary depending on environmental change. During the  
30 Anthropocene, many species now inhabit novel ecosystems characterized by a  
31 changing climate, non-native species, and a human-modified habitat [1,2]. In these  
32 novel ecosystems, species interactions occur among species that previously never  
33 interacted (hereafter: novel interaction) [3–5]. Native species can be susceptible to  
34 negative consequences from novel interactions as they lack a co-evolutionary history  
35 with their interactors [6,7]. It is difficult to predict when and where novel interactions  
36 will emerge, and whether their outcome is positive or negative for native species, as  
37 little empirical evidence of novel interactions exist [8,9]. Therefore, understanding the  
38 causes and consequences of novel interactions is important for ecosystem  
39 management and conservation [8,10].

40 Most studies on novel interactions focus on interactions between exotic and native  
41 species caused by biological invasion [4,11,12]. On the other hand, human-induced  
42 environmental changes, such as anthropogenic habitat modification (e.g. land use  
43 change) and climate change (e.g. global warming), have been overlooked as a cause of  
44 novel interactions, even though these changes alter the behaviour, abundance, and  
45 phenology of species, which significantly influences species interactions [13–15].  
46 Moreover, these environmental changes provide consumers with opportunities for  
47 acquiring novel resources [8,16]. However, to our knowledge, there are no studies  
48 showing empirical evidence that anthropogenic habitat modification generates novel  
49 interactions among native species (but suggested by Fagan et al. [17]).

50 We focus on a predator-prey interaction between the brown bear (*Ursus arctos*) and

51 nymphs of a cicada species (*Lyristes bihamatus*) in the Shiretoko World Natural  
52 Heritage (hereafter: SWH), northern Japan. This is a case of a novel interaction  
53 between native species because both species are native but brown bears have only  
54 started preying on cicada nymphs since 2000 in the area [18]. The interaction is  
55 generated by a driver that is not associated with the invasion of either predator or prey  
56 species. The plantation, a typical type of human-modified habitat [19], is one possible  
57 driver of the bear-cicada interaction, given brown bear predation on cicada nymphs  
58 were frequently observed in larch (*Larix kaempferi*) plantations [18].

59           In this study, we evaluated the frequency of predation and the density of  
60 cicada nymphs between the natural forest and the plantations. We made the following  
61 predictions according to our previous findings [18]: (1) brown bear predation on cicada  
62 nymphs occurs more frequently in the plantations than in the natural forest; (2) the  
63 density of cicada nymphs is higher in the plantations than in the natural forest; (3)  
64 there is a positive relationship between predation frequency and the density of cicada  
65 nymphs.

66

## 67 **Materials & Methods**

68

### 69 (a) Site Description

70       The study was conducted in forests located on the western parts of the Shiretoko  
71 Peninsula (Fig. S1). The elevation ranged from 120 m to 220 m. UNESCO has certified  
72 the area as a World Heritage site because it represents one of the richest northern

73 temperate ecosystems in the world (<http://whc.unesco.org/en/list/1193>). The natural  
74 forests are conifer-broadleaved mixed forests, mainly consisting of Sakhalin fir (*Abies*  
75 *sachalinensis*) and Mongolian oak (*Quercus crispula*). Natural forests account for 82%  
76 of the forest area in the study site, while plantations account for 18% of the total forest  
77 area. Spruce (*Picea glehnii*), larch and fir plantations account for 13%, 4%, and 1% of  
78 the total forest area, respectively. Most of the larch and fir plantations were  
79 established during the late 1970s, whereas the spruce plantations were established  
80 during the early 1990s [20]. The vegetation map of the study site is shown in Fig. S2.

81 The SWH has one of the highest densities of brown bear in the world[21]. Within the  
82 study site, food items of the brown bears change across seasons; that is, herbaceous  
83 plants are consumed in spring, herbaceous plants, ants and cicada nymphs are  
84 consumed in summer, and *Q. crispula* acorns and anadromous salmon are consumed in  
85 autumn [18,22,23]. Within the study area at least 11 individual bears were preying on  
86 cicada nymphs, including two subadults, two solitary female adults, and three females  
87 with cubs [18]. Two native cicada species, *Lyristes bihamatus* and *Terpnosia nigricosta*,  
88 occur in the SNH and emerge during late summer and spring to early summer,  
89 respectively. In the study site, brown bears prey on the nymphs of *L. bihamatus*, but  
90 not *T. nigricosta* [18]. Hence, this study focuses on *L. bihamatus* as a prey item of bears  
91 and the term “cicada” refers to *L. bihamatus*.

92

### 93 (b) Field Survey

94 From late August to September 2018, 100 m<sup>2</sup> survey plots were set in the following  
95 forest types: larch plantations (N = 15), fir plantations (N = 12), spruce plantations (N =

96 15), and natural forests (N = 30). The location of the survey plots is shown in Fig. S2. A  
97 larger number of plots were in the natural forest, as this is the highest proportion of  
98 forest for all forest types. Stand characteristics of each forest type are shown in Table 1.  
99 The density of cicada nymphs was measured using the density of cicada exuviae  
100 collected from all trees (diameter breast height, DBH > 2 cm) within the plots. Sampling  
101 heights of trees were less than 3 m. Brown bear predation on cicada nymphs was  
102 measured by observing digging traces of brown bears, as the bears dig up soil when  
103 preying on cicada nymphs [18]. According to our preliminary observations by camera  
104 traps, brown bears usually dig for cicada nymphs near the base of a tree. We evaluated  
105 the predation frequency per each plot as the proportion of trees that had digging  
106 traces within a 50 cm radius from the base of a tree for all trees (DBH > 2 cm) in the  
107 plot.

### 108 (c) Statistical Analysis

109 Generalized linear models (GLMs) with a log link, Poisson error distribution and  
110 Tukey post hoc tests were used to examine the differences in predation frequency and  
111 the density of cicada nymph among the forest types. When the GLM indicated a  
112 significant difference ( $p$ -value < 0.05) of one forest type from others, we performed a  
113 multiple comparison between the forest types. In the GLM analysis for predation  
114 frequency, we introduced an offset term as the number of trees (log-transformed) to  
115 adjust for differences in the number of trees among the survey plots. To examine the  
116 effects of cicada nymph density on predation frequency, we used GLMs with log links  
117 and Poisson error distributions for each forest type. Number of trees (log-transformed)  
118 were included as an offset term in the GLMs. All statistical analyses were conducted in  
119 R version 3.5.1 [24].

120

## 121 **Results**

122 The GLMs indicated a significant effect of forest type on predation frequency and the  
123 density of cicada nymphs. Surprisingly, brown bear predation on cicada nymphs only  
124 occurred in plantation plots, not the natural forest plots even in which mainly  
125 composed of fir species (Fig. 1A). The density of cicada nymphs was lowest in the  
126 natural forest plots (Fig. 1B). The predation frequency was highest in the larch  
127 plantation plots, but the density of cicada nymphs did not differ from in the fir  
128 plantation plots, which had a lower predation frequency (Fig. 1). The spruce plantation  
129 plots had a lower predation frequency and the density of cicada nymphs than other  
130 types of plantation plots (Fig. 1). The density of cicada nymphs positively affected the  
131 predation frequency in all plantation types (GLM,  $p < 0.05$  Fig. 2), suggesting that  
132 predation occurred more frequently as the density of cicada nymphs increased.

133

## 134 **Discussion**

135 The results of our study generally supported the predictions. In particular, brown  
136 bear predation on cicada nymphs only occurred in the plantations, not the natural  
137 forests. Furthermore, in the SWH, the plantations were established during the late  
138 1970s, with trees reaching maturation around 2000 [20,25]. Because cicada nymphs  
139 generally grow under mature trees [26], they could inhabit the plantations since 2000  
140 in this area. These indicate the high density of cicada nymphs have occurred in the  
141 plantation since about 2000; consequently, the bear-cicada interaction has emerged. To  
142 our knowledge, this is the first study presenting empirical evidence of a novel

143 interaction between native species due to anthropogenic habitat modification.

144 Our results indicate that the differences in predation frequency among forest types  
145 can generally be explained by the density of cicada nymphs (Figs. 1,2). However, the  
146 predation frequency in larch plantation was higher than in fir plantation despite no  
147 differences in the density of cicada nymphs between these types of plantations. The  
148 most plausible reason for this is that the density of cicada nymphs in the larch  
149 plantations was underestimated. The use of cicada exuviae as a proxy for the nymph  
150 density may have resulted in an underestimation of actual nymph density because it  
151 does not account for nymphs that were already preyed upon by the brown bears.  
152 Another reason is that brown bears had fewer chances of encountering fir plantations  
153 than larch plantations because the total area of larch plantations was larger than fir  
154 plantations at the study site (Fig. S2). One final reason is the social transmission of  
155 information from mothers to their cubs that cicada nymphs were abundant in larch  
156 plantations, which might constrain brown bears to prey on nymphs within the larch  
157 plantations. Tomita & Hiura [18] showed that bears preying on cicada nymphs mainly  
158 consisted of solitary adult females and females with cubs. Since socially learned  
159 foraging behaviours in bears are expected to be female biased [27,28], the predatory  
160 behaviour might propagate through the brown bear population via social learning.  
161 Moreover, because brown bears in the SWH show female-biased philopatry [29],  
162 female bears learning the behaviour may stay within the study site.

163 Consistent with our results, other studies have shown high densities of cicada  
164 nymphs in human-modified habitats, such as forest edges and plantations [30–32],  
165 though the reasons are unclear (but see Yang [33]). This suggests that anthropogenic  
166 habitat modifications provide high quality habitat for cicadas. Since some birds and



167 mammals prey on cicadas [18,34,35], anthropogenic habitat modifications can  
168 positively affect these predators via increasing availability of cicada nymphs.

169 Although the density of cicada nymphs in the larch, fir, and spruce plantations was  
170 underestimated compared to natural forests due to predation by brown bears, the  
171 density in these plantations was still significantly higher than in the natural forests (Fig.  
172 1B). This indicates the positive effects of plantations on the cicada population  
173 compensate for the negative effects of increased predation. Therefore, the bear-cicada  
174 interaction does not seem to lead to negative consequences for the cicada population,  
175 a notion supported by the fact that the interaction has continued for 20 years at the  
176 study site [18].

177 Detecting novel interactions among native species is challenging because it can be  
178 difficult to determine whether they are novel or are pre-existing interactions that have  
179 been overlooked. Therefore, we might be failing to notice how anthropogenic habitat  
180 modifications generate novel interactions among native species, even though the  
181 impacts of anthropogenic habitat modification on native species assemblages  
182 continues to strengthen around the world [36]. Our study draws attention to an  
183 overlooked aspect of the effects of anthropogenic habitat modification on species  
184 interactions. Furthermore, our results showed that this bear-cicada interaction does  
185 not seem to have negative consequences for the cicada population. On the other hand,  
186 Liu et al. [37] showed how global warming caused a novel interaction between a native  
187 herbivore and a native plant that had significant negative impacts on plant  
188 reproduction. Further studies are needed to understand the consequences of novel  
189 interactions caused by anthropogenic environmental changes, such as habitat  
190 modification and climate change.

191

## 192 **Acknowledgments**

193       We thank members of Shiretoko Nature Foundation for providing information on  
194 study site. We also thank H. Maita and Daisetsu I. and T. Itoh for field survey assistance  
195 and I. Koizumi for providing valuable comments on the manuscript, and I. Tanada for  
196 advice the English of the manuscript.

197

## 198 **References**

- 199 1. Hobbs RJ, Higgs E, Harris JA. 2009 Novel ecosystems: implications for conservation  
200 and restoration. *Trends Ecol. Evol.* **24**, 599–605. (doi:10.1016/j.tree.2009.05.012)
- 201 2. Radeloff VC *et al.* 2015 The rise of novelty in ecosystems. *Ecol. Appl.* **25**, 2051–  
202 2068. (doi:10.1890/14-1781.1)
- 203 3. Pearse IS, Altermatt F. 2013 Predicting novel trophic interactions in a non-native  
204 world. *Ecol. Lett.* **16**, 1088–1094. (doi:10.1111/ele.12143)
- 205 4. Wood JR, Dickie IA, Moeller H V., Peltzer DA, Bonner KI, Rattray G, Wilmshurst JM.  
206 2015 Novel interactions between non-native mammals and fungi facilitate  
207 establishment of invasive pines. *J. Ecol.* **103**, 121–129. (doi:10.1111/1365-  
208 2745.12345)
- 209 5. Carthey AJR, Banks PB. 2014 Naïveté in novel ecological interactions: Lessons  
210 from theory and experimental evidence. *Biol. Rev.* **89**, 932–949.  
211 (doi:10.1111/brv.12087)
- 212 6. Oyake N *et al.* 2020 Comparison of susceptibility to a toxic alien toad (*Bufo*  
213 *japonicus formosus*) between predators in its native and invaded ranges. *Freshw.*  
214 *Biol.* **65**, 240–252. (doi:10.1111/fwb.13417)
- 215 7. Dohzono I, Kunitake YK, Yokoyama J, Goka K. 2008 Alien bumble bee affects  
216 native plant reproduction through interactions with native bumble bees. *Ecology*  
217 **89**, 3082–3092. (doi:10.1890/07-1491.1)
- 218 8. Guiden PW, Bartel SL, Byer NW, Shipley AA, Orrock JL. 2019 Predator–prey  
219 interactions in the Anthropocene: Reconciling multiple aspects of novelty. *Trends*  
220 *Ecol. Evol.* **34**, 616–627. (doi:10.1016/j.tree.2019.02.017)
- 221 9. Pearse IS, Harris DJ, Karban R, Sih A. 2013 Predicting novel herbivore-plant  
222 interactions. *Oikos* **122**, 1554–1564. (doi:10.1111/j.1600-0706.2013.00527.x)
- 223 10. Saul WC, Jeschke JM. 2015 Eco-evolutionary experience in novel species  
224 interactions. *Ecol. Lett.* **18**, 236–245. (doi:10.1111/ele.12408)
- 225 11. Bezemer TM, Harvey JA, Cronin JT. 2014 Response of native insect communities  
226 to invasive plants. *Annu. Rev. Entomol.* **59**, 119–141. (doi:10.1146/annurev-ento-  
227 011613-162104)
- 228 12. Traveset A, Richardson DM. 2014 Mutualistic interactions and biological invasions.

- 229        *Annu. Rev. Ecol. Evol. Syst.* **45**, 89–113. (doi:10.1146/annurev-ecolsys-120213-  
230        091857)
- 231    13. Tuomainen U, Candolin U. 2011 Behavioural responses to human-induced  
232        environmental change. *Biol. Rev.* **86**, 640–657. (doi:10.1111/j.1469-  
233        185X.2010.00164.x)
- 234    14. Maas B, Putra DD, Waltert M, Clough Y, Tschardt T, Schulze CH. 2009 Six years  
235        of habitat modification in a tropical rainforest margin of Indonesia do not affect  
236        bird diversity but endemic forest species. *Biol. Conserv.* **142**, 2665–2671.  
237        (doi:10.1016/j.biocon.2009.06.018)
- 238    15. Lurgi M, López BC, Montoya JM. 2012 Novel communities from climate change.  
239        *Philos. Trans. R. Soc. B Biol. Sci.* **367**, 2913–2922. (doi:10.1098/rstb.2012.0238)
- 240    16. Fleming PA, Bateman PW. 2018 Novel predation opportunities in anthropogenic  
241        landscapes. *Anim. Behav.* **138**, 145–155. (doi:10.1016/j.anbehav.2018.02.011)
- 242    17. Fagan WF, Cantrell RS, Cosner C. 1999 How habitat edges change species  
243        interactions. *Am. Nat.* **153**, 165–182. (doi:10.1086/303162)
- 244    18. Tomita K, Hiura T. 2019 Brown bear digging for cicada nymphs: a novel interaction  
245        in a forest ecosystem. *Ecology* (doi:10.1002/ecy.2899)
- 246    19. Brockerhoff EG, Jactel H, Parrotta JA, Quine CP, Sayer J. 2008 Plantation forests  
247        and biodiversity: Oxymoron or opportunity? *Biodivers. Conserv.* **17**, 925–951.  
248        (doi:10.1007/s10531-008-9380-x)
- 249    20. Shoyama K. 2008 Reforestation of abandoned pasture on Hokkaido, northern  
250        Japan: Effect of plantations on the recovery of conifer-broadleaved mixed forest.  
251        *Landsc. Ecol. Eng.* **4**, 11–23. (doi:10.1007/s11355-008-0034-7)
- 252    21. Shimozuru M *et al.* 2019 Incidence of multiple paternity and inbreeding in high-  
253        density brown bear populations on the shiretoko Peninsula, Hokkaido, Japan. *J.*  
254        *Hered.* **110**, 321–331. (doi:10.1093/jhered/esz002)
- 255    22. Ohdachi S, Aoi T. 1987 Food habits of brown bears in Hokkaido, Japan. *Bears Their*  
256        *Biol. Manag.* **7**, 215. (doi:10.2307/3872627)
- 257    23. Matsubayashi J, Morimoto J, Mano T, Aryal A, Nakamura F. 2014 Using stable  
258        isotopes to understand the feeding ecology of the Hokkaido brown bear ( *Ursus*  
259        *arctos* ) in Japan. *Ursus* **25**, 87–97. (doi:10.2192/ursus-d-12-00015.1)

- 260 24. R Core Team. 2018 R: A language and environment for statistical computing.
- 261 25. Shoyama K. 2013 Effects of thinning and excluding deer browsing on sapling  
262 establishment and growth in larch plantations. *Landsc. Ecol. Eng.* **9**, 77–87.  
263 (doi:10.1007/s11355-011-0178-8)
- 264 26. Dybas HS, Lloyd M. 1974 The habitats of 17-year periodical cicadas (Homoptera:  
265 Cicadidae: Magicicada Spp.). *Ecol. Monogr.* **44**, 279–324. (doi:10.2307/2937032)
- 266 27. Mazur R, Seher V. 2008 Socially learned foraging behaviour in wild black bears,  
267 *Ursus americanus*. *Anim. Behav.* **75**, 1503–1508.  
268 (doi:10.1016/j.anbehav.2007.10.027)
- 269 28. Morehouse AT, Graves TA, Mikle N, Boyce MS. 2016 Nature vs. nurture: Evidence  
270 for social learning of conflict behaviour in Grizzly Bears. *PLoS One* **11**, e0165425.  
271 (doi:10.1371/journal.pone.0165425)
- 272 29. Shirane Y *et al.* 2019 Sex-biased dispersal and inbreeding avoidance in Hokkaido  
273 brown bears. *J. Mammal.* **100**, 1317–1326. (doi:10.1093/jmammal/gyz097)
- 274 30. Chiavacci SJ, Bednarz JC, McKay T. 2014 The emergence densities of annual  
275 cicadas (Hemiptera: Cicadidae) increase with sapling density and are greater near  
276 edges in a bottomland hardwood forest. *Environ. Entomol.* **43**, 859–867.  
277 (doi:10.1603/en13338)
- 278 31. Lee Y-F, Lin Y-H, Wu S-H. 2010 Spatiotemporal variation in cicada diversity and  
279 distribution, and tree use by exuviating nymphs, in east Asian Tropical Reef-Karst  
280 forests and forestry plantations. *Ann. Entomol. Soc. Am.* **103**, 216–226.  
281 (doi:10.1603/an09100)
- 282 32. White J. 1980 Resource partitioning by ovipositing cicadas. *Am. Nat.* **115**, 1–28.  
283 (doi:10.1086/283543)
- 284 33. Yang LH. 2006 Periodical cicadas use light for oviposition site selection. *Proc. R.*  
285 *Soc. B Biol. Sci.* **273**, 2993–3000. (doi:10.1098/rspb.2006.3676)
- 286 34. Smith DM, Kelly JF, Finch DM. 2006 Cicada emergence in southwestern riparian  
287 forest: Influences of wildfire and vegetation composition. *Ecol. Appl.* **16**, 1608–  
288 1618. (doi:10.1542/peds.2005-1284)
- 289 35. Lovari S, Valier P, Lucchi MR. 1994 Ranging behaviour and activity of red foxes  
290 (*Vulpes vulpes*: Mammalia) in relation to environmental variables, in a  
291 Mediterranean mixed pinewood. *J. Zool.* **232**, 323–339. (doi:10.1111/j.1469-

292 7998.1994.tb01576.x)

293 36. Hill JK, Hamer KC. 2004 Determining impacts of habitat modification on diversity  
294 of tropical forest fauna: The importance of spatial scale. *J. Appl. Ecol.* **41**, 744–  
295 754. (doi:10.1111/j.0021-8901.2004.00926.x)

296 37. Liu Y, Reich PB, Li G, Sun S. 2011 Shifting phenology and abundance under  
297 experimental warming alters trophic relationships and plant reproductive  
298 capacity. *Ecology* **92**, 1201–1207. (doi:10.1890/10-2060.1)

299

## 300 **Figures & Table**

301 Table 1 Stand characteristics across the forest types.

| Forest type(Number of plots) | Dominant tree species (%Basal area)                               | Density of trees (Trees 100m <sup>-2</sup> ) | Basal area (m <sup>2</sup> 100m <sup>-2</sup> ) |
|------------------------------|-------------------------------------------------------------------|----------------------------------------------|-------------------------------------------------|
| Larch plantation (N=15)      | <i>Larix kaempferi</i> (97%)                                      | 32.06 ± 7.78                                 | 0.12 ± 0.04                                     |
| Fir plantation (N=12)        | <i>Abies sachalinensis</i> (84%)                                  | 30.17 ± 10.80                                | 0.11 ± 0.04                                     |
| Spruce plantation (N=15)     | <i>Picea glehnii</i> (95%)                                        | 27.14 ± 6.36                                 | 0.09 ± 0.03                                     |
| Natural forest (N=30)        | <i>Abies sachalinensis</i> (31%)<br><i>Quercus crispula</i> (28%) | 30.87 ± 10.73                                | 0.10 ± 0.05                                     |

302 Figure 1

303 (A) Frequency of predation of brown bear on cicada nymphs and (B) the  
304 density of cicada nymphs in larch plantations, fir plantations, spruce  
305 plantations, and natural forests. Different letters indicate significant  
306 differences (Tukey test,  $p < 0.05$ ).

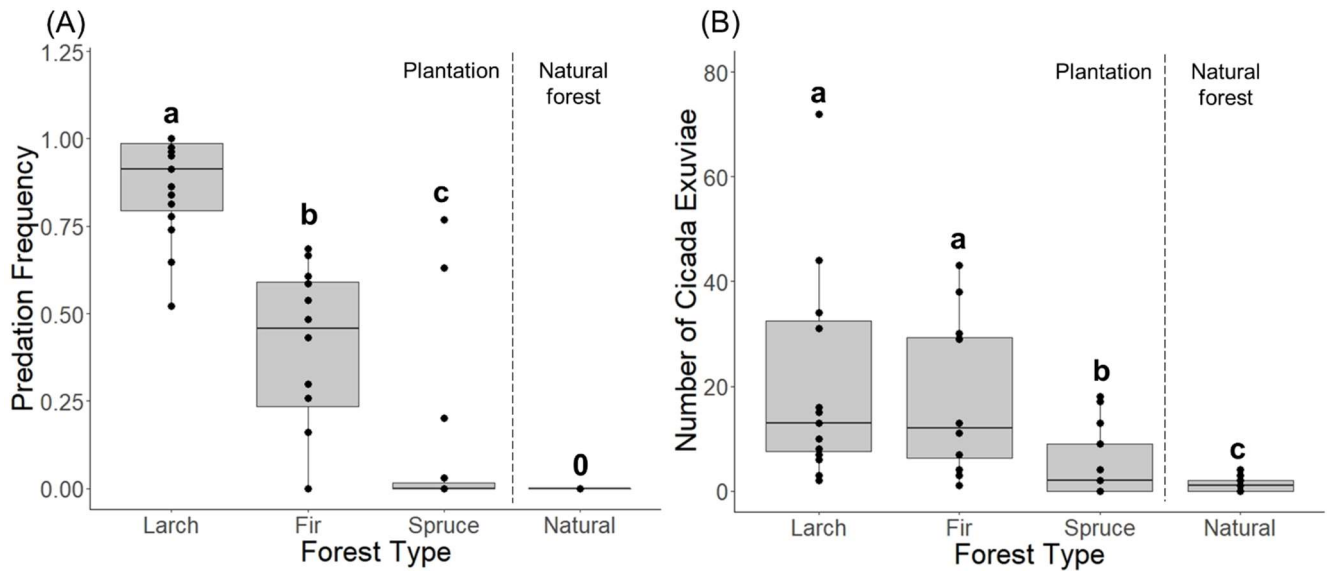



307 Figure 2

308 Relationships between the predation of brown bear on cicada nymphs and  
309 the density of cicada nymphs. Dashed lines show the linear model  
310 predictions with shaded areas indicating the 95% CI. The relationships are  
311 significantly positive in larch plantation (Left), fir plantation (Center),  
312 spruce plantation (Right) (GLM,  $p < 0.05$ ).

313

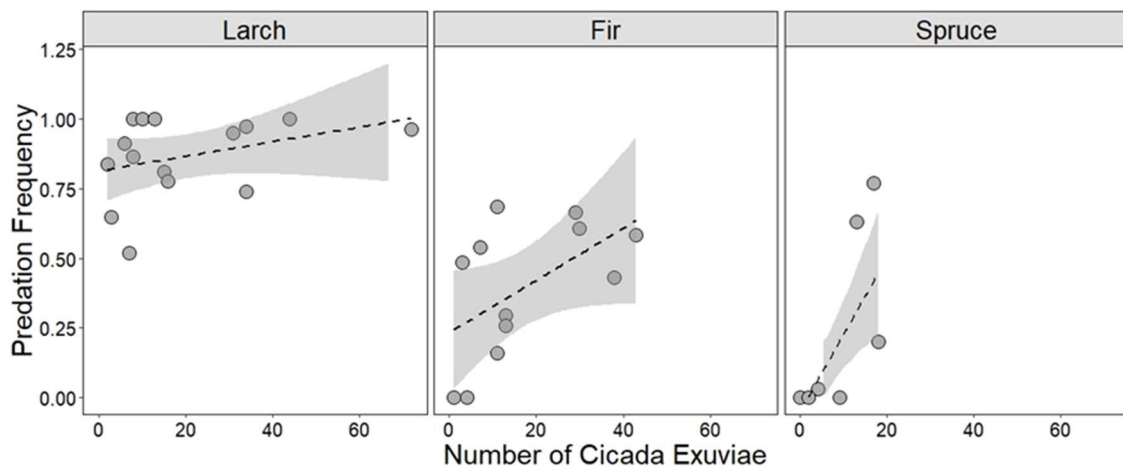

Source: http://biorxiv.org/content/10.1101/2020.02.22.960583v1.full.pdf
